# Supplementary material
Source: HighWire-hosted journal article supplement (https://jnm.snmjournals.org/highwire/filestream/94177/field_highwire_adjunct_files/0/83741_Supplemental_Data.pdf)
Supplement: 83741_Supplemental_Data.pdf [file 83741_Supplemental_Data.pdf]

## Supplemental Table 1

Sensitivities and specificities according to anatomical location and submodality, adjusted for clustering of lesions

| Lesion location               | Modality          |                   |                      |                   |                   |
|-------------------------------|-------------------|-------------------|----------------------|-------------------|-------------------|
|                               | CT-phases         |                   |                      |                   | PET               |
|                               | combined          | early arterial    | portal-venous inflow | venous            |                   |
| <b>All locations</b>          |                   |                   |                      |                   |                   |
| Sensitivity (95%-CI)          | 73.1% (64.2-80.4) | 41.4% (30.3-53.4) | 69.8% (48.4-71.2)    | 60.3% (49.2-71.9) | 69.8% (58.6-79.1) |
| Specificity (95%-CI)          | 86.0% (74.5-92.8) | 95.9% (87.1-98.8) | 94.1% (85.1-97.8)    | 92.7% (82.2-97.2) | 98.0% (92.7-99.5) |
| <b>Liver</b>                  |                   |                   |                      |                   |                   |
| Sensitivity (95%-CI)          | 82.3% (71.4-89.8) | 38.0% (22.1-57.2) | 70.9% (53.0-84.1)    | 66.3% (47.6-80.9) | 77.9% (61.7-88.5) |
| Specificity (95%-CI)          | 79.1% (62.6-89.5) | 89.7% (74.0-96.4) | 92.4% (78.9-97.6)    | 91.1% (76.5-97.0) | 99.2% (92.9-99.9) |
| <b>Lymph nodes</b>            |                   |                   |                      |                   |                   |
| Sensitivity (95%-CI)          | 53.0% (37.3-68.1) | 40.3% (21.0-63.1) | 40.3% (21.0-63.1)    | 50.5% (28.9-71.9) | 70.0% (48.3-85.3) |
| Specificity (95%-CI)          | -                 | -                 | -                    | -                 | -                 |
| <b>Bone</b>                   |                   |                   |                      |                   |                   |
| Sensitivity (95%-CI)          | 71.8% (28.9-94.1) | 75.6% (21.7-97.2) | 75.6% (21.7-97.2)    | 75.6% (21.7-97.2) | 22.3% (2.5-76.1)  |
| Specificity (95%-CI)          | -                 | -                 | -                    | -                 | -                 |
| <b>Pancreas</b>               |                   |                   |                      |                   |                   |
| Sensitivity (95%-CI)          | 58.3% (32.2-80.5) | 54.1% (18.2-86.2) | 54.1% (18.2-86.2)    | 54.1% (18.2-86.2) | 97.4% (76.0-99.8) |
| Specificity (95%-CI)          | -                 | -                 | -                    | -                 | -                 |
| <b>Gastrointestinal tract</b> |                   |                   |                      |                   |                   |
| Sensitivity (95%-CI)          | 0.0% (no CI)      | 0.0% (no CI)      | 0.0% (no CI)         | 0.0% (no CI)      | 100.0% (no CI)    |
| Specificity (95%-CI)          | -                 | -                 | -                    | -                 | -                 |
| <b>Basal lung</b>             |                   |                   |                      |                   |                   |
| Sensitivity (95%-CI)          | 100.0% (no CI)    | 66.7% (no CI)     | 66.7% (no CI)        | 100.0% (no CI)    | 16.7% (no CI)     |
| Specificity (95%-CI)          | -                 | -                 | -                    | -                 | -                 |
| <b>Other</b>                  |                   |                   |                      |                   |                   |
| Sensitivity (95%-CI)          | 50.0% (0.2-99.8)  | 52.5% (0-99.9)    | 52.5% (0-99.9)       | 52.5% (0-99.9)    | 99.7% (6.4-100.0) |
| Specificity (95%-CI)          | -                 | -                 | -                    | -                 | -                 |

Legend: CI, confidence interval; -, calculation not possible
